# Supplementary material for: High performance ternary organic solar cells assisted by red fluorescent materials through improved emission lifetime and complementary short wavelength light absorption
Source: Royal Society of Chemistry journal article supplement (doi:10.1039/d4tc02796e), 2024-01-01
Supplement: d4tc02796e1.pdf [file d4tc02796e1.pdf]

## Supporting Information

# High Performance Ternary Organic Solar Cells Assisted by Red Fluorescent Materials Through Improved Emission Lifetime and Complementary Short Wavelength Light Absorption

Yingze Lei<sup>a</sup>, Zhiyong Liu<sup>a\*</sup> and Han Zhang<sup>a</sup>

<sup>a</sup>Institute of Physics and Electronic Information, Yunnan Normal University, Kunming 650500, China.

\*Corresponding authors: ([liuzhiyong@ynnu.edu.cn](mailto:liuzhiyong@ynnu.edu.cn) (Z.Y Liu))

## **4. Experimental details**

### **4.1 Materials**

PM6 and Y6 were purchased from Solarmer Materials Inc; DCJTb was purchased from Luminescence Technology Corp; Chloroform (CF) was purchased from Sigma-Aldrich Co. MoO<sub>3</sub> and Ag were purchased from Alfa Aesar Co. The photoactive solution with the blend of PM6, Y6 and DCJTb (the ratio of the PM6:Y6 is 1:1.3, PM6 content is 10 mg mL<sup>-1</sup>, DCJTb content were varied according to measurement) was dissolved in CF and stirred overnight. The photoactive solution with the solvent additive of 1-chloronaphthalene (CN) (0.5%, v/v). The ZnO solution was synthesized by a sol-gel method <sup>1,2</sup>.

### **4.2 Device preparation and characteristics**

Indium–tin-oxide (ITO) glasses were ultrasonicated at 30 °C in isopropyl alcohol, acetone and deionized water for 30 min. The ITO glasses were then dried by a stream of nitrogen and heated on the hot-stage. Firstly, spin-coating ZnO solution on the top of ITO glass (the speed is 3000 rpm and continue 1 min) and baked at 150 °C for 20 min in air (the thickness of ZnO thin films is 20 nm). The photoactive layer solution was spin-coated on the ZnO layer in a N<sub>2</sub>-filled glove box to form the photoactive layer (the speed is 1800 rpm and continue 1 min), and the thermal annealing treatment (120 °C for 15 min, the nominal thickness of ~100 nm). The electron extraction layer of the MoO<sub>3</sub> layer and electrode of Ag films were evaporated under vacuum through a shadow mask to define the active area of the devices (2×2 mm<sup>2</sup>). The OSC devices have an inverted configuration: ITO/ZnO/D18-Cl:Y6:DCJTb/MoO<sub>3</sub>/Ag. All average

values with standard deviations were calculated from ten parallel devices. The current density versus voltage ( $J$ - $V$ ) characteristics of the OSCs were measured in a glove box with a computer-controlled Keithley 236 Source Measure Unit under illumination at 100 mW cm<sup>-2</sup> using an AM1.5 G solar simulator. The external quantum efficiency ( $EQE$ ) spectrum was measured with a Stanford Research Systems model SR830 DSP lock-in amplifier coupled to a WDG3 monochromator and a 500 W xenon lamp.

The space-charge-limited-current (SCLC) method was employed to investigate the charge carrier mobility. The charge carrier mobility was measured by the space charge limited current (SCLC) method, and the hole-only and electron-only devices had ITO/PEDOT:PSS/photoactive layer/Au and Al/photoactive layer/Al structures, respectively. The charge carrier mobilities were calculated using the following equation<sup>3,4</sup>:

$$J = \frac{9}{8} \epsilon_r \epsilon_0 \mu \frac{V^2}{d^3}$$

where  $J$  is the current density,  $\mu$  is the charge carrier mobility,  $\epsilon_0$  (8.85×10<sup>-14</sup> F/cm) and  $\epsilon_r$  are the permittivity of free space and relative permittivity of the material ( $\epsilon_r$  was assumed to be 3), respectively, and  $V$  is the SCLC effective voltage. The charge carrier mobility was calculated using the following equation<sup>5</sup>:

$$\mu = \mu_0 \exp\left[0.89\gamma \sqrt{\frac{V}{L}}\right]$$

where  $\mu_0$  is the charge mobility under zero electric field and  $\gamma$  is a constant.

The Mott-Gurney equation can then be described by<sup>6</sup>:

$$J = \frac{9}{8} \varepsilon_r \varepsilon_0 \mu_0 \frac{V^2}{L^3} \exp\left[0.89\gamma \sqrt{\frac{V}{L}}\right]$$

In this case, the charge mobility were estimated using the following equation <sup>6</sup>:

$$\ln\left(\frac{JL^3}{V^2}\right) = 0.89\gamma \sqrt{\frac{V}{L}} + \ln\left(\frac{9}{8} \varepsilon_r \varepsilon_0 \mu_0\right)$$

### 4.3 XRD Measurement

The angles at which the peak intensities occur are related to the inter-planar distances of the atomic structure of the photoactive layer and the crystallinity of the photoactive layer; these angles are related by Bragg's law <sup>7</sup>:

$$\lambda = 2d \sin \theta$$

where  $\lambda$  is the wavelength of the X-ray radiation used (0.154 nm),  $\theta$  is the peak position half-angle, and  $d$  is the inter-planar distance.

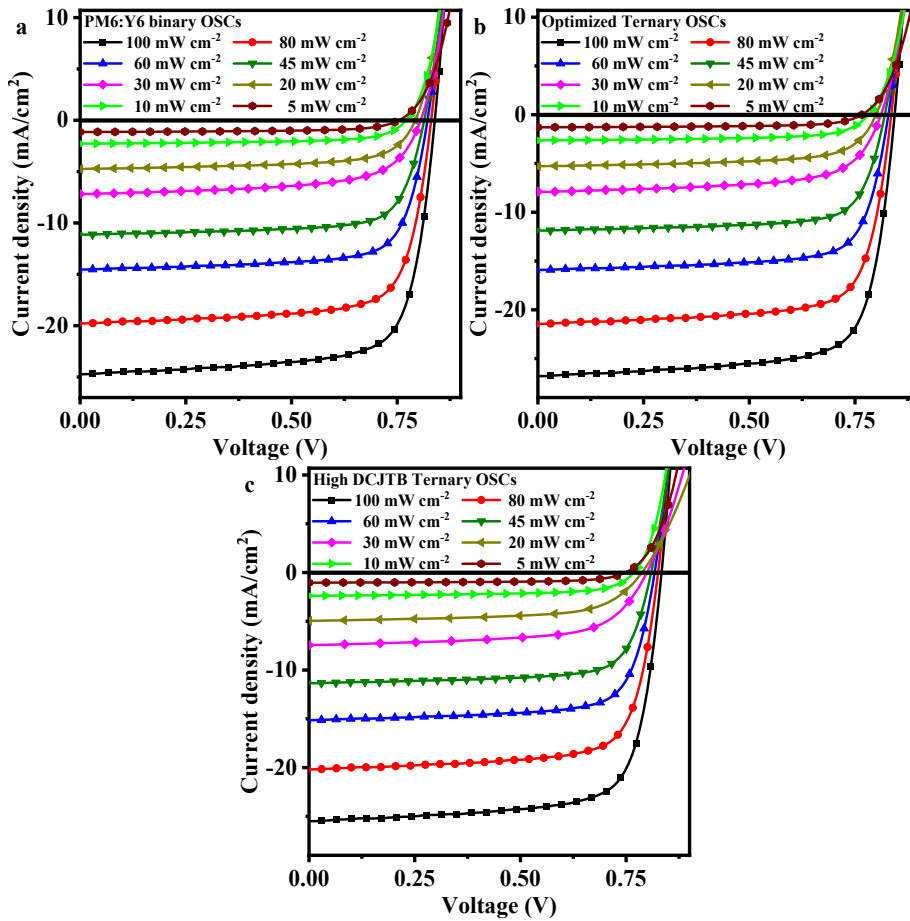

**Figure S1.**  $J$ - $V$  characteristics of typical OSCs of PM6:Y6 based binary OSCs, optimized ternary OSCs and high DCJTb ternary OSCs under various light intensities ranging from  $100 \text{ mW cm}^{-2}$  to  $5 \text{ mW cm}^{-2}$  corresponding to Figure S1(a), S1(b) and S1(c), respectively.

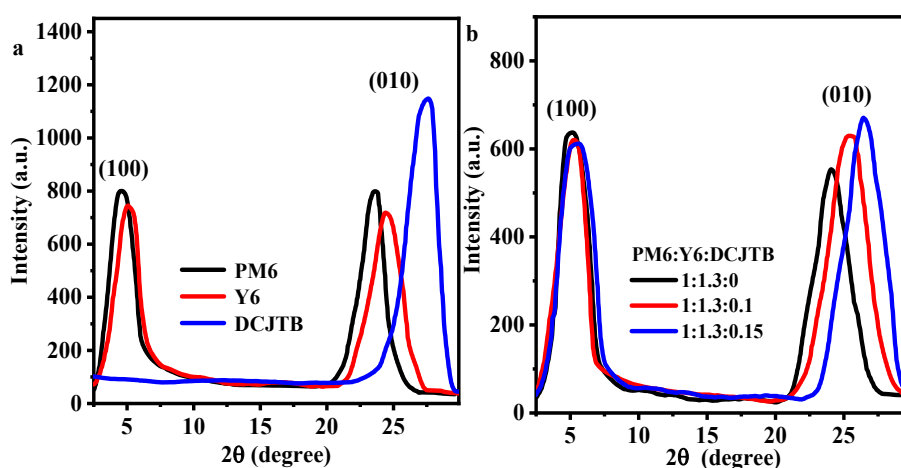

**Figure S2.** The XRD curve of neat films (PM6, Y6 and DCJTb) for (a) and three typical films (PM6:Y6 binary film, optimized ternary film and high DCJTb ternary film) for (b).

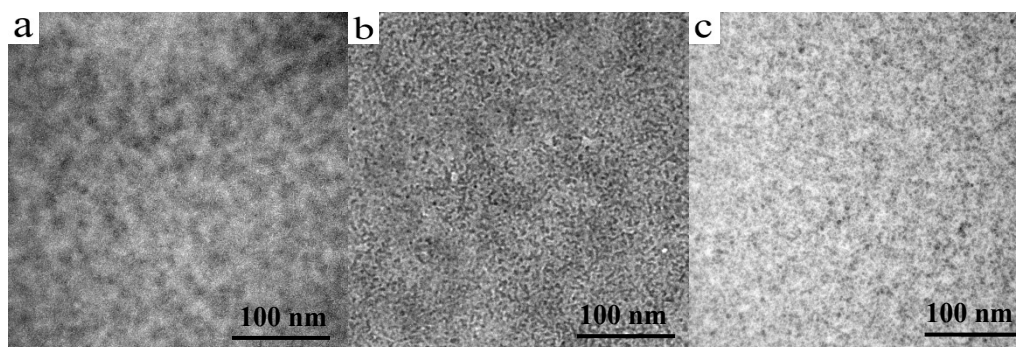

**Figure S3.** The TEM image of neat PM6, Y6 and DCJTb films.

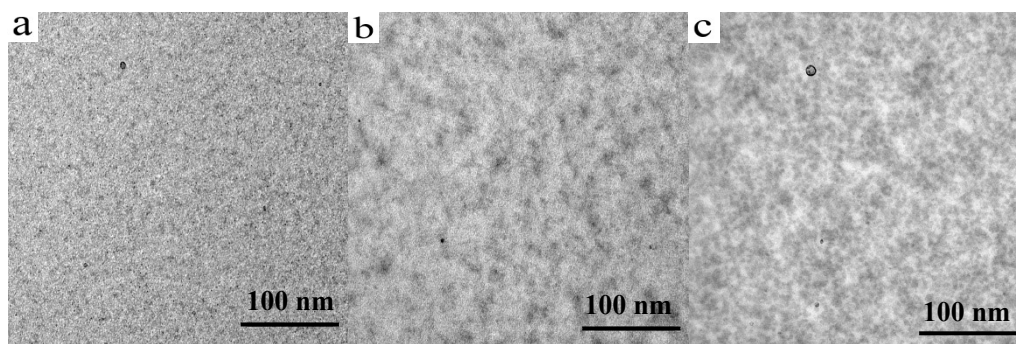

**Figure S4.** The TEM image of three typical films.

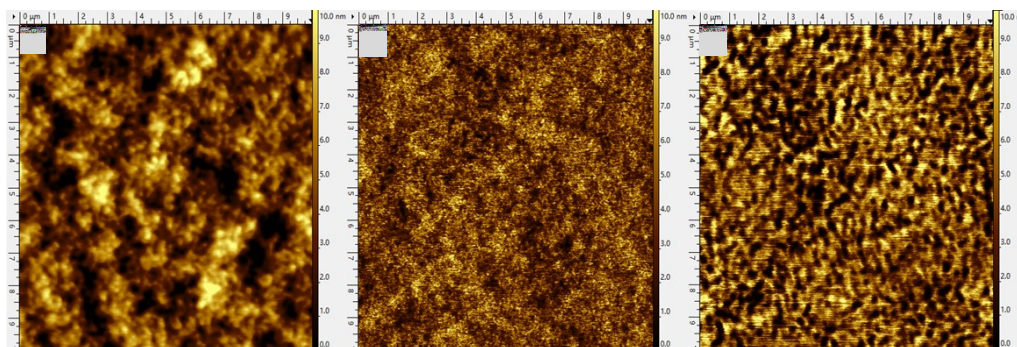

**Figure S5.** The AFM image of neat PM6, Y6 and DCJTb films.

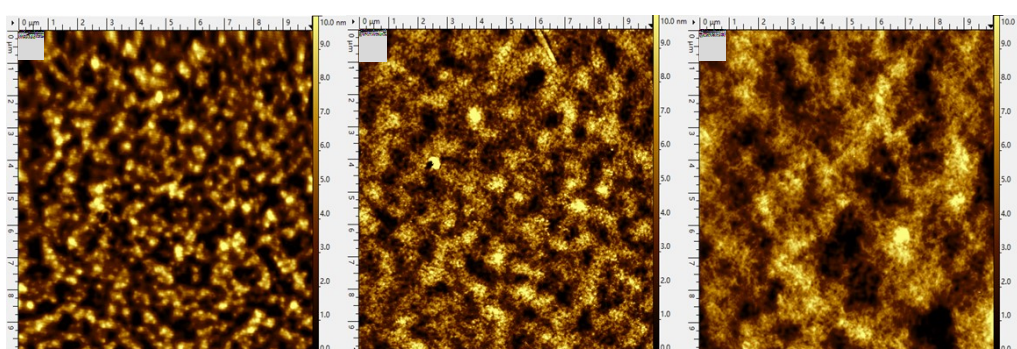

**Figure S6.** The AFM image of three typical films.

## Reference:

1. W. Yu, L. Huang, D. Yang, P. Fu, L. Zhou, J. Zhang and C. Li, *Journal of Materials Chemistry A*, 2015, **3**, 10660-10665.
2. U. Galan, Y. Lin, G. J. Ehlert and H. A. Sodano, *Composites Science and Technology*, 2011, **71**, 946-954.
3. H.-W. Li, Z. Guan, Y. Cheng, T. Lui, Q. Yang, C.-S. Lee, S. Chen and S.-W. Tsang, *Advanced Electronic Materials*, 2016, **2**, 1600200.
4. V. Narasimhan, D. Jiang and S.-Y. Park, *Applied Energy*, 2016, **162**, 450-459.
5. Q. An, F. Zhang, Q. Sun, M. Zhang, J. Zhang, W. Tang, X. Yin and Z. Deng, *Nano Energy*, 2016, **26**, 180-191.
6. Q. An, F. Zhang, W. Gao, Q. Sun, M. Zhang, C. Yang and J. Zhang, *Nano Energy*, 2018, **45**, 177-183.
7. L. Zhao, S. Zhao, Z. Xu, Q. Yang, D. Huang and X. Xu, *Nanoscale*, 2015, **7**, 5537-5544.
